# Supplementary material for: Correlating antimicrobial activity and model membrane leakage induced by nylon-3 polymers and detergents
Source: Royal Society of Chemistry journal article supplement (doi:10.1039/c5sm01521a), 2015-01-01
Supplement: c5sm01521a1.pdf [file c5sm01521a1.pdf]

**Figure ESI-1:** Leakage data of Cetyl Trimethyl Ammonium Bromide (CTAB), Sodium Dodecyl Sulfate (SDS), N-Lauroyl Sarcosine (Sodium Salt) (NLS), Benzalkonium chloride (BAC), 1-Dodecylpyridinium chloride hydrate (DPyC), n-Octyl- $\beta$ -D-glucopyranoside (OG), and Octaethylene Glycol Monododecyl Ether (C12EO8) acting on 30  $\mu$ M YPLE vesicles; different symbols of the same color represent independent measurements. Panel A shows the dye efflux after 1 hour as a function of detergent concentration. Panel B shows efflux as a function of the fluorescence lifetime of entrapped dye,  $\tau_E$ , on a reciprocal scale. The red arrow represents all-or-none leakage induced by CTAB.
